# Supplementary material for: Ferrocene-diketopyrrolopyrrole based non-fullerene acceptors for bulk heterojunction polymer solar cells
Source: Royal Society of Chemistry journal article supplement (doi:10.1039/c7ta03322b), 2017-01-01
Supplement: c7ta03322b1.pdf [file c7ta03322b1.pdf]

## Supporting Information

### Ferrocene-diketopyrrolopyrrole based non-fullerene acceptors for bulk heterojunction polymer solar cells

Yuvraj Patil<sup>a</sup>, Rajneesh Misra<sup>a\*</sup>, Rahul Singhal<sup>b</sup> and Ganesh D. Sharma<sup>c\*</sup>

<sup>a</sup>Department of Chemistry

Indian Institute of Technology, Indore (MP) 453552, India

<sup>b</sup>Department of Physics, Malaviya National Institute of Technology (MNIT), Jaipur (Raj.), India

<sup>c</sup>Department of Physics, LNM Institute of Information Technology (Deemed University), Jamdoli, Jaipur (Raj.) 302031, India

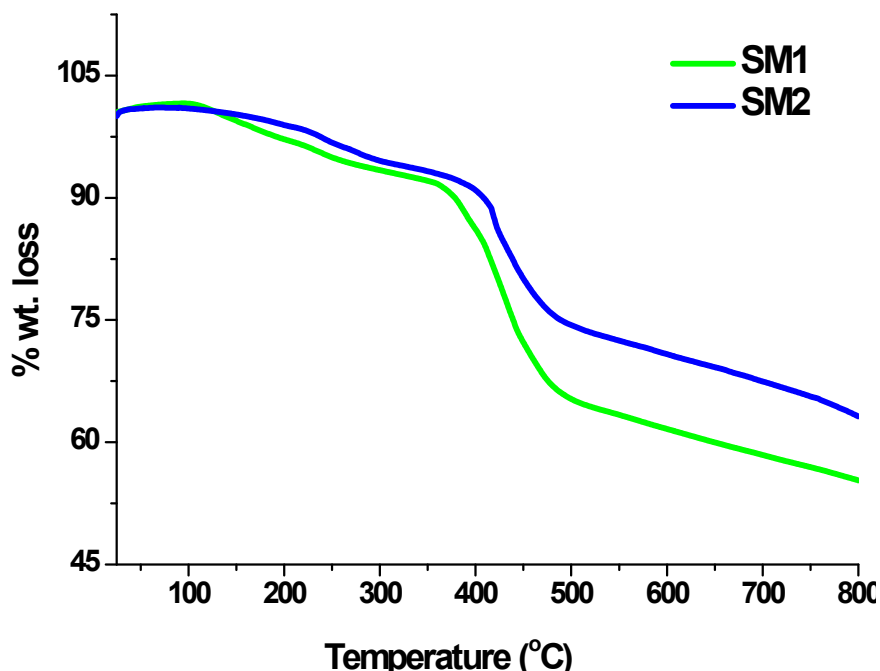

**Fig. S1** Thermogravimetric analysis of SM1 and SM2 measured at a heating rate of 10 °C/min under nitrogen atmosphere.

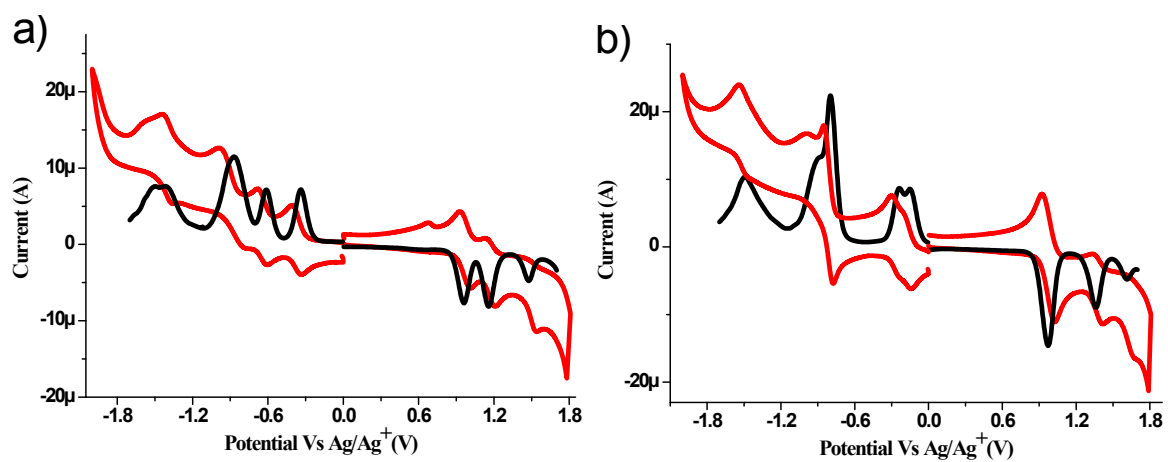

**Fig. S2** CV (red line) and DPV (black line) plots of (a) **SM1** and (b) **SM2**.

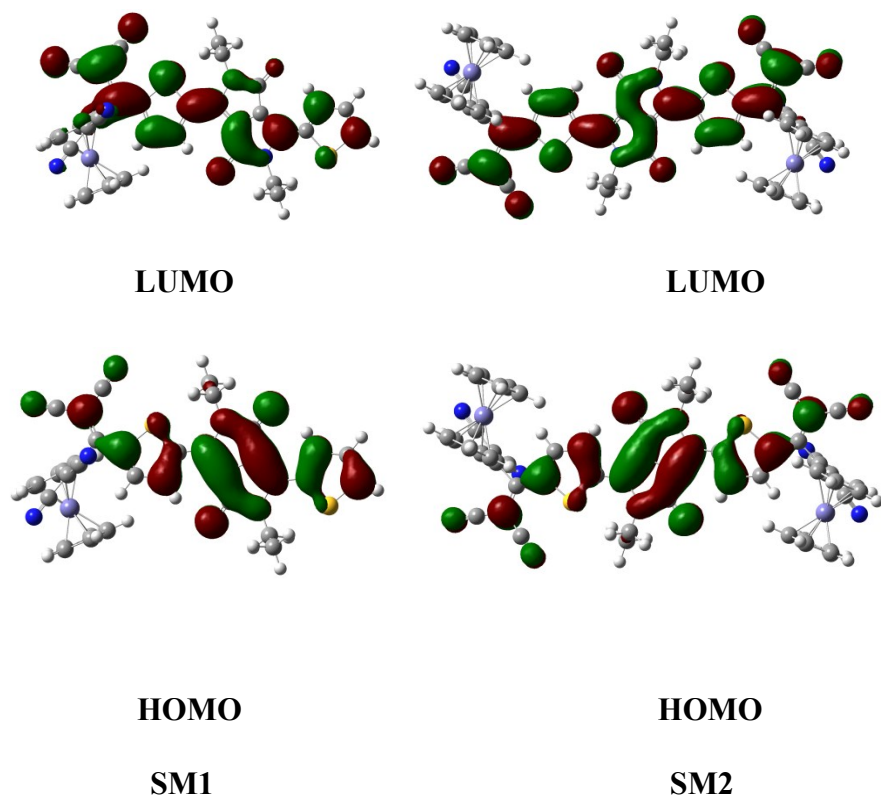

**Fig. S3** The frontier molecular orbitals of **SM1** and **SM2** at B3LYP/6-31G(d) level.

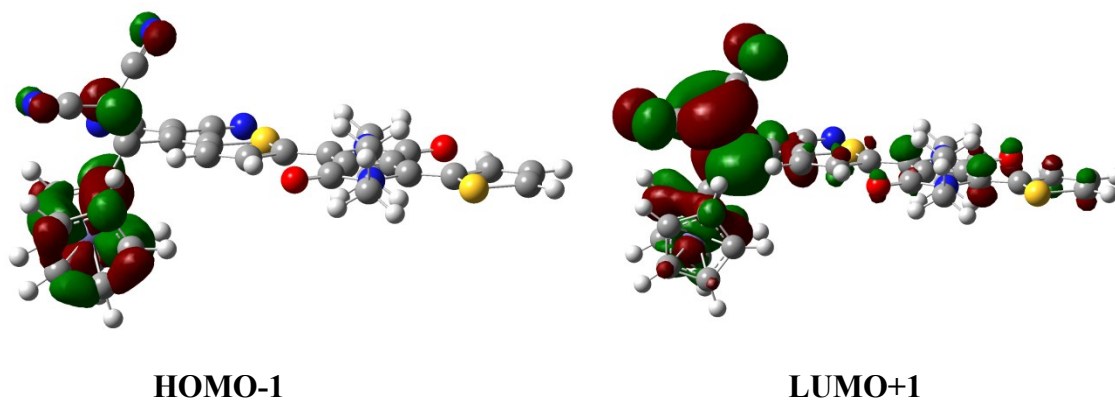

**Fig. S4** The frontier molecular orbitals of **SM1** at B3LYP/6-31G(d) level.

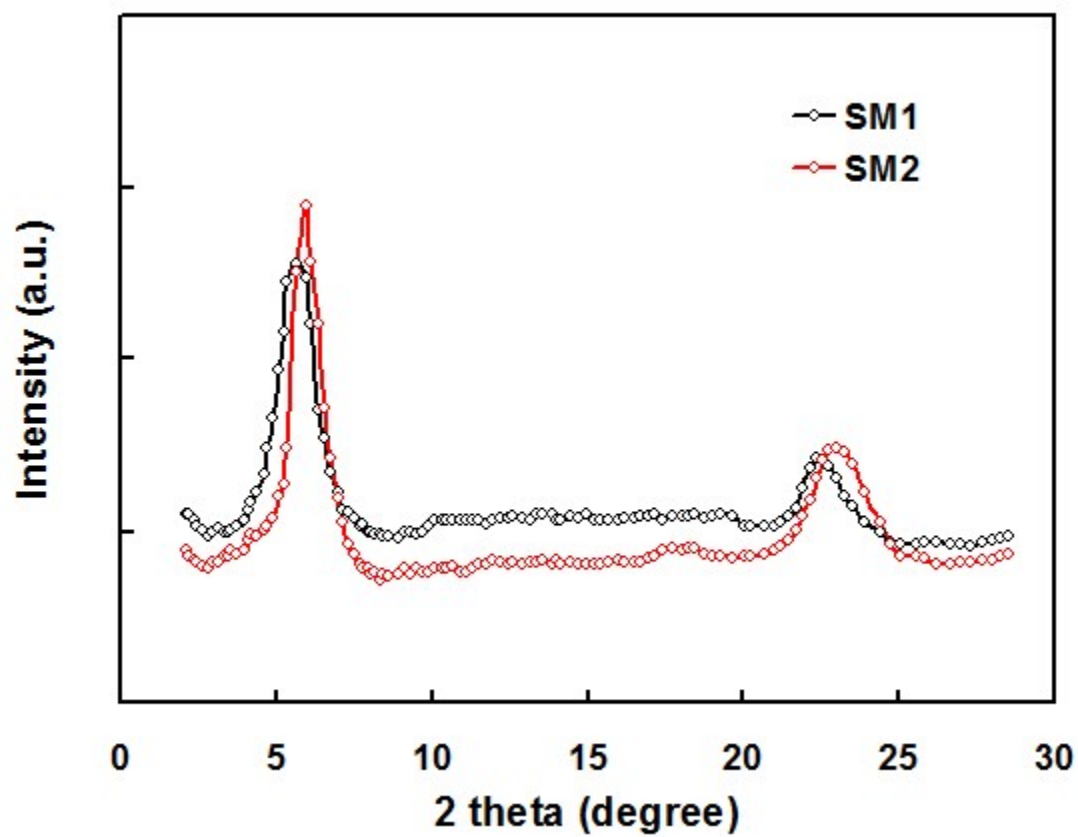

**Fig. S5** XRD patterns of the **SM1** and **SM2** thin films.

**Table S1.** Calculated major electronic transitions for **SM1** and **SM2** in the gas phase.

|            | Wavelength<br>(nm) | Composition             | Assignment                    | $f^a$ |
|------------|--------------------|-------------------------|-------------------------------|-------|
| <b>SM1</b> | 672                | HOMO→LUMO<br>(0.60)     | $\pi$ - $\pi^*$<br>transition | 0.51  |
| <b>SM1</b> | 662                | HOMO→LUMO<br>(0.37)     | $\pi$ - $\pi^*$<br>transition | 0.20  |
|            |                    | HOMO-1→LUMO+1<br>(0.38) | -----                         |       |
| <b>SM2</b> | 735                | HOMO→LUMO<br>(0.70)     | $\pi$ - $\pi^*$<br>transition | 1.07  |

 $f^a$ = Oscillation Strength**Table S2** Photovoltaic properties of the devices based on as cast and DIO (3v%) additive **P:SM1 (1:2)** and **P:SM2 (1:2)** active layers

| Active layers                | $J_{sc}$ (mA/cm <sup>2</sup> ) | $V_{oc}$ (V) | FF   | PCE (%) |
|------------------------------|--------------------------------|--------------|------|---------|
| <b>P:SM1</b> (as cst)        | 6.23                           | 1.02         | 0.38 | 2.41    |
| <b>P:SM2</b> (as cast )      | 7.05                           | 0.91         | 0.41 | 2.66    |
| <b>P:SM1</b> (DIO additive ) | 8.81                           | 0.98         | 0.49 | 4.23    |
| <b>P:SM2</b> (DIO additive ) | 9.68                           | 0.88         | 0.52 | 4.88    |

## Experimental Section:

The UV-visible absorption spectra of DPPs were recorded on UV-visible Spectrophotometer in dichloromethane. The TGA analyses were performed on the thermal analysis system at the heating rate of 10 °C per minute under a nitrogen atmosphere. Cyclic voltammograms (CVs) and

differential voltammograms (DPVs) were recorded in dichloromethane solvent using 0.1 M tetrabutylammonium hexafluorophosphate ( $\text{Bu}_4\text{NPF}_6$ ) as supporting electrolyte on an electrochemical analyzer using glassy carbon as working electrode, Pt wire as the counter electrode, and saturated  $\text{Ag}/\text{Ag}^+$  as the reference electrode.

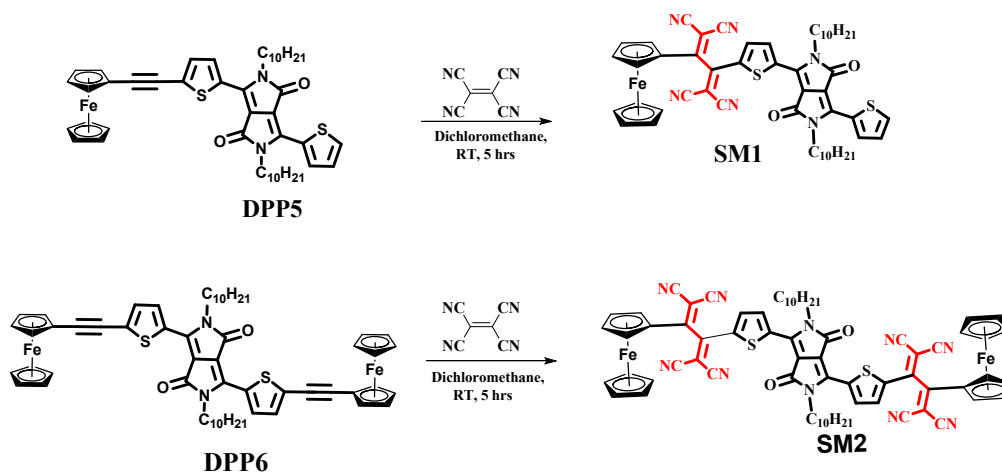

**Scheme S1.** Synthesis of TCBD based DPPs **SM1** and **SM2**.

#### Synthesis of **SM1**:

In 50 ml round bottom flask DPP **5** (0.100 g, 0.13 mmol) and TCNE (0.018 g, 0.14 mmol) were dissolved in dichloromethane (15 ml) under argon atmosphere. The reaction mixture was stirred at room temperature for 5 hours. The solvent was removed under vacuo and the product was purified by silica-column chromatography with hexane : dichloromethane (1:1) as an eluent to yield **SM1** as a dark blue colored solid in 91% yield.

#### Synthesis of **SM2**:

In 50 ml round bottom flask DPP **6** (0.100 g, 0.10 mmol) and TCNE (0.026 g, 0.20 mmol) were dissolved in dichloromethane (15 ml) under argon atmosphere. The reaction mixture was stirred

at room temperature for 5 hours. The solvent was removed under vacuo and the product was purified by silica-column chromatography with hexane : dichloromethane (2:1) as an eluent to yield 95% **SM2** as a dark green colored solid.

### **Device fabrication**

The PSCs were fabricated with a configuration of ITO/ PEDOT:PSS (40 nm)/**P:SM1** or **SM2**/PFN/Al. Firstly, indium tin oxide coated glass substrates were cleaned with detergent powder solution and then ultrasonicated in deionized water, acetone and isopropyl alcohol sequentially for 15 min each and then dried in vacuum oven for 2 hr at 50° C. A thin layer of PEDOT:PSS was deposited through spin-coating on pre-cleaned ITO-coated glass substrate from a PEDOT:PSS aqueous solution (Baytron P VP AI 4083) at 2000 rpm and dried subsequently at 120 °C for 15 min in air. The active layer solution was prepared by mixing P and SM1 or SM2 in different weight ratio from 1:1 to 1:2.5 in THF solution with total concentration of 16 mg/mL and spun cast on the top of PEDOT:PSS film at 1500 rpm for 30s. For solvent additive, different concentration of DIO was added to the host THF solution and then the solution was stirred overnight on a hot plate at 120 °C. The warm solution was spun on the top of PEDOT:PSS film at 1500 rpm for 30 s. After the films were (i) either transferred to vacuum oven immediately for slow vacuum drying at room temperature for 2 hr or (ii) thermally annealed at 110 °C for 2 min. Then methanol solution of PFN at a concentration of 1.0 mg/ mL was deposited on the top the active layer at 3000 rpm for 30 s to afford a thickness of 15 nm. Finally, top Al electrode was deposited in vacuum onto the cathode buffer layer at a pressure of  $\approx 1.0 \times 10^{-5}$  Pa. The active area of the device was 10 mm<sup>2</sup>. We have fabricated four devices in one substrate. The current-voltage (*J-V*) characteristics of the PSCs were measured on a computer controlled Keithley 2450 Source meter. Solar Simulator with a 450 W xenon lamp and an air mass (AM) 1.5 filter was used as the light source. The light intensity was kept constant at 100 mW/cm<sup>2</sup>. The IPCE of the devices was measured at illuminating the device through the light source and monochromator and the resulting current was measured using a Keithley electrometer under short circuit condition. All the measurements were done in ambient condition without encapsulating the devices.

## TDDFT Data

Calculation method:

B3LYP/6-31+G\*\* for C, H, N, O, S, and Lanl2DZ for Fe with Gaussian 09 [1].

### Excitation energies and oscillator strengths:

#### For SM1

Excited State 1: Singlet-A 1.8076 eV 685.92 nm f=0.0010  
<S\*\*2>=0.000

|     |       |          |
|-----|-------|----------|
| 171 | ->174 | 0.17131  |
| 171 | ->175 | 0.49707  |
| 171 | ->176 | -0.10957 |
| 171 | ->179 | 0.35595  |
| 172 | ->178 | 0.24610  |

This state for optimization and/or second-order correction.

Total Energy, E(TD-HF/TD-KS) = -2784.88234257

Copying the excited state density for this state as the 1-particle RhoCI density.

Excited State 2: Singlet-A 1.8456 eV 671.79 nm f=0.5106  
<S\*\*2>=0.000

|     |       |          |
|-----|-------|----------|
| 171 | ->178 | 0.13341  |
| 172 | ->174 | -0.10388 |
| 172 | ->175 | -0.23952 |
| 172 | ->179 | -0.18922 |
| 173 | ->174 | 0.60375  |
| 173 | <-174 | -0.10494 |

Excited State 3: Singlet-A 1.8739 eV 661.64 nm f=0.2008  
<S\*\*2>=0.000

|     |       |          |
|-----|-------|----------|
| 171 | ->178 | -0.23384 |
| 172 | ->174 | 0.19879  |
| 172 | ->175 | 0.37688  |
| 172 | ->179 | 0.31798  |
| 173 | ->174 | 0.36503  |

Excited State 4: Singlet-A 2.0910 eV 592.93 nm f=0.0005  
<S\*\*2>=0.000

|     |       |          |
|-----|-------|----------|
| 171 | ->178 | 0.11455  |
| 172 | ->174 | 0.66504  |
| 172 | ->175 | -0.12685 |
| 172 | ->176 | 0.10087  |
| 172 | ->179 | -0.11863 |

Excited State 5: Singlet-A 2.1678 eV 571.93 nm f=0.0013  
<S\*\*2>=0.000

|     |       |          |
|-----|-------|----------|
| 171 | ->174 | 0.67676  |
| 172 | ->178 | -0.10672 |

Excited State 6: Singlet-A 2.2585 eV 548.97 nm f=0.0393  
<S\*\*2>=0.000

173 ->175                    0.69450

## For SM2

Excited State 1:            Singlet-A            1.6871 eV   734.88 nm   f=1.0714

<S\*\*2>=0.000

253 -> 254            0.70456

253 <- 254            -0.12709

This state for optimization and/or second-order correction.

Total Energy, E(TD-HF/TD-KS) = -3817.95121639

Copying the excited state density for this state as the 1-particle RhoCI density.

Excited State 2:            Singlet-A            1.7459 eV   710.13 nm   f=0.0114

<S\*\*2>=0.000

251 -> 254            0.61586

251 -> 255            0.17163

251 -> 256            -0.11147

251 -> 262            0.10482

252 -> 254            -0.18876

Excited State 3:            Singlet-A            1.7507 eV   708.20 nm   f=0.0158

<S\*\*2>=0.000

251 -> 254            0.18618

252 -> 254            0.62759

252 -> 255            -0.15906

252 -> 256            -0.10477

Excited State 4:            Singlet-A            1.7620 eV   703.66 nm   f=0.0008

<S\*\*2>=0.000

249 -> 254            0.39706

249 -> 255            0.20753

249 -> 256            -0.29559

249 -> 257            0.26659

249 -> 262            0.23177

249 -> 263            0.13810

251 -> 260            -0.19076

Excited State 5:            Singlet-A            1.7706 eV   700.22 nm   f=0.0007

<S\*\*2>=0.000

250 -> 254            0.39048

250 -> 255            -0.18462

250 -> 256            -0.30798

250 -> 257            -0.27414

250 -> 262            0.15364

250 -> 263            -0.23028

252 -> 261            0.19414

Excited State 6:            Singlet-A            1.8699 eV   663.06 nm   f=0.0015

<S\*\*2>=0.000

250 -> 254            0.47629

250 -> 256            0.15688

250 -> 257            0.16716



|            |          |
|------------|----------|
| 250 -> 261 | -0.13473 |
| 250 -> 263 | 0.13134  |
| 252 -> 254 | -0.13762 |
| 252 -> 256 | -0.19937 |
| 252 -> 257 | -0.19207 |
| 252 -> 261 | -0.12304 |
| 252 -> 262 | 0.10466  |
| 252 -> 263 | -0.15704 |

## Reference

1. M. J. Frisch, G. W. Trucks, H. B. Schlegel, G. E. Scuseria, M. A. Robb, J. R. Cheeseman, G. Scalmani, V. Barone, B. Mennucci, G. A. Petersson, H. Nakatsuji, M. Caricato, X. Li, H. P. Hratchian, A. F. Izmaylov, J. Bloino, G. Zheng, J. L. Sonnenberg, M. Hada, M. Ehara, K. Toyota, R. Fukuda, J. Hasegawa, M. Ishida, T. Nakajima, Y. Honda, O. Kitao, H. Nakai, T. Vreven, J. A. Montgomery Jr., J. E. Peralta, F. Ogliaro, M. Bearpark, J. J. Heyd, E. Brothers, K. N. Kudin, V. N. Staroverov, R. Kobayashi, J. Normand, K. Raghavachari, A. Rendell, J. C. Burant, S. S. Iyengar, J. Tomasi, M. Cossi, N. Rega, J. M. KGaA, Weinheim Millam, M. Klene, J. E. Knox, J. B. Cross, V. Bakken, C. Adamo, J. Jaramillo, R. Gomperts, R. E. Stratmann, O. Yazyev, A. J. Austin, R. Cammi, C. Pomelli, J. W. Ochterski, R. L. Martin, K. Morokuma, V. G. Zakrzewski, G. A. Voth, P. Salvador, J. J. Dannenberg, S. Dapprich, A. D. Daniels, Ö. Farkas, J. B. Foresman, J. V. Ortiz, J. Cioslowski and D. J. Fox, Gaussian 09, revision D.01 *Gaussian, Inc.*, Wallingford, CT, USA, 2009.
